# Supplementary material
Source: Springer Nature journal article supplement (https://www.springermedizin.de/resource/supplementary/12889_2011_3301_MOESM4_ESM.pdf/9488644)

# Counts Per Minute

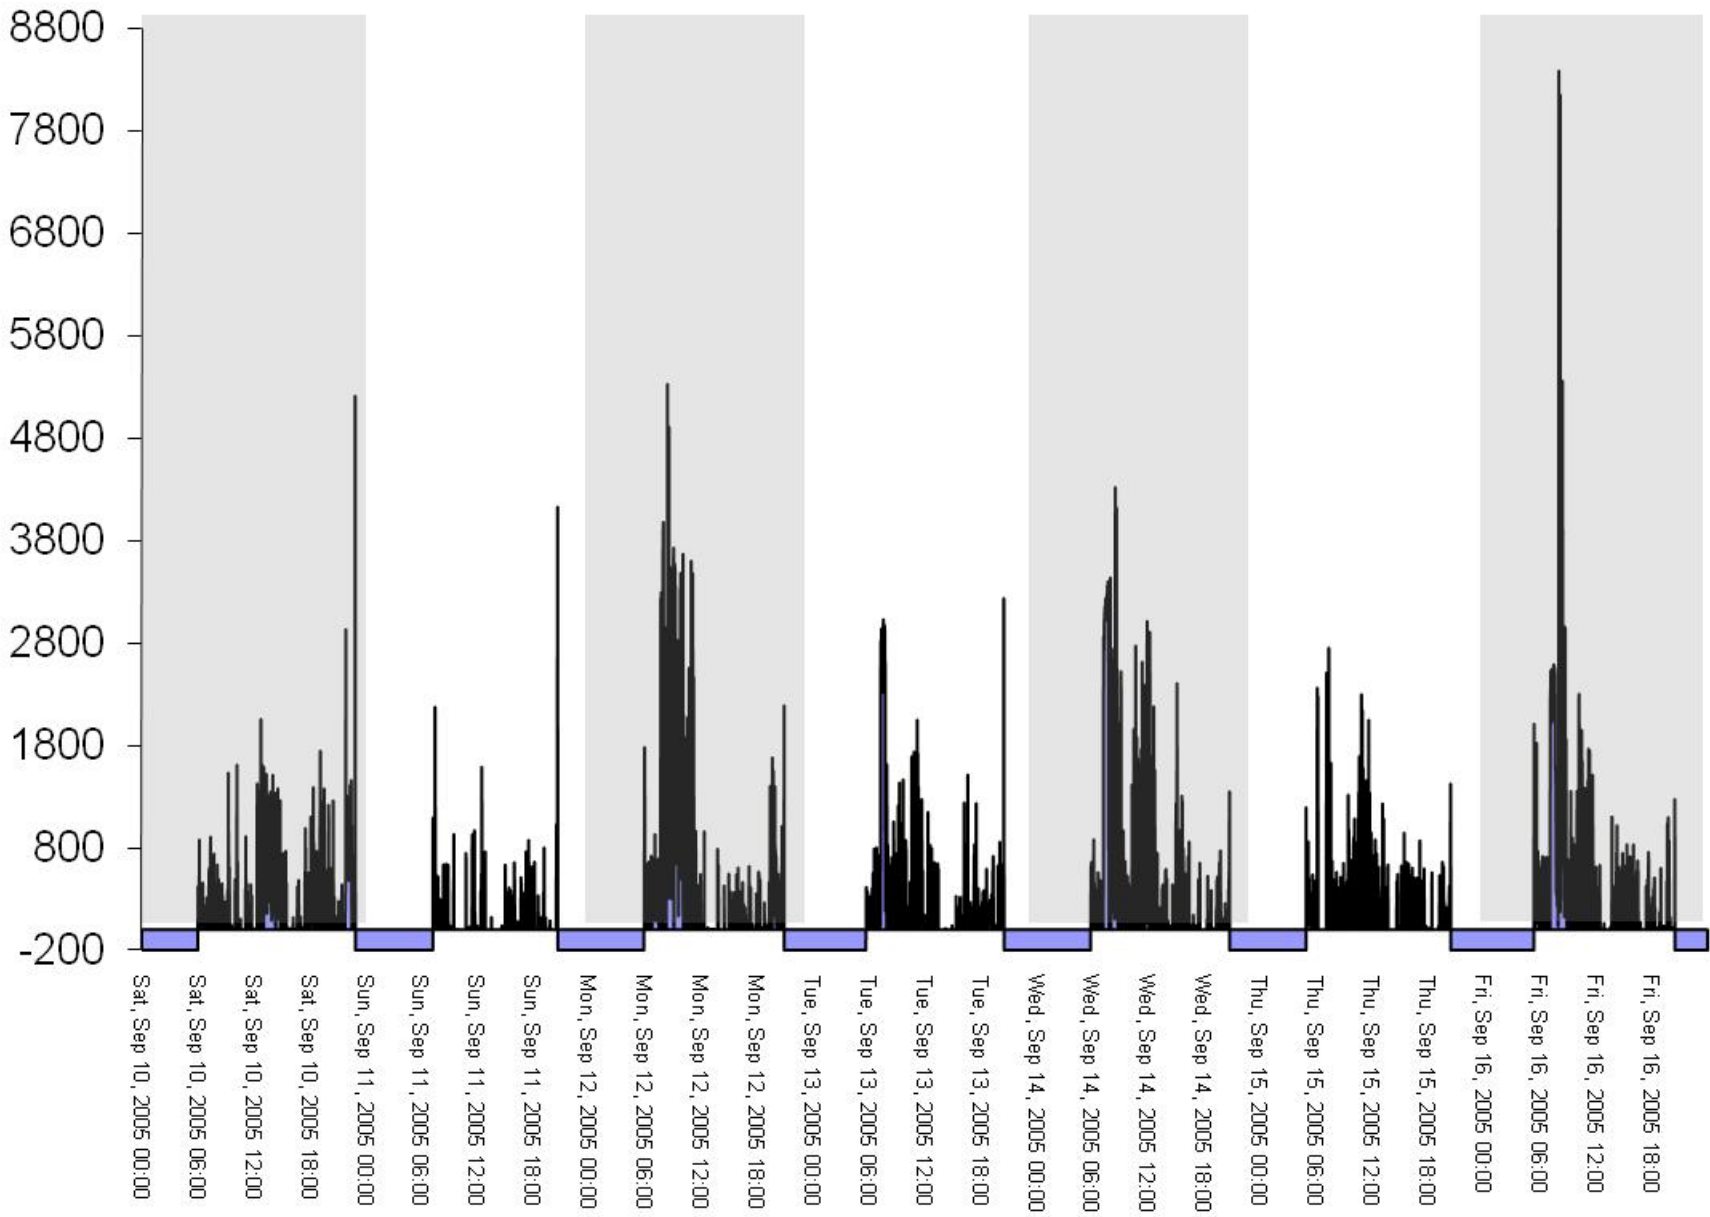

Supplement: MOESM4 [file 9488644]
